# Supplementary material for: Stage-specific expression patterns and co-targeting relationships among miRNAs in the developing mouse cerebral cortex
Source: PubMed Central journal article supplement (PMC11493953; doi:10.1038/s42003-024-07092-7), 2024-10-22
Supplement: 42003_2024_7092_MOESM3_ESM.pdf [file 42003_2024_7092_MOESM3_ESM.pdf]

## Description Of Additional Supplementary File

**File name:** Supplementary Data 1

**Description:** Differentially expressed miRNAs between E14, E17 and P0 cortical samples as well as NPCs versus neurons.

**File name:** Supplementary Data 2

**Description:** Module assignment of miRNAs in the WCGNA analysis.

**File name:** Supplementary Data 3

**Description:** GO terms of miRNA targets of the black and green modules from the WCGNA analysis.

**File name:** Supplementary Data 4

**Description:** Significant co-targeting relationships between miRNAs/miRNA families.

**File name:** Supplementary Data 5

**Description:** Individual values underlying figures.
